# Supplementary material
Source: PubMed Central journal article supplement (PMC150027)
Supplement: plntcell_15_3_745__2.pdf [file plntcell_15_3_745__2.pdf]

**Low temperature (4°C, 3 days)**

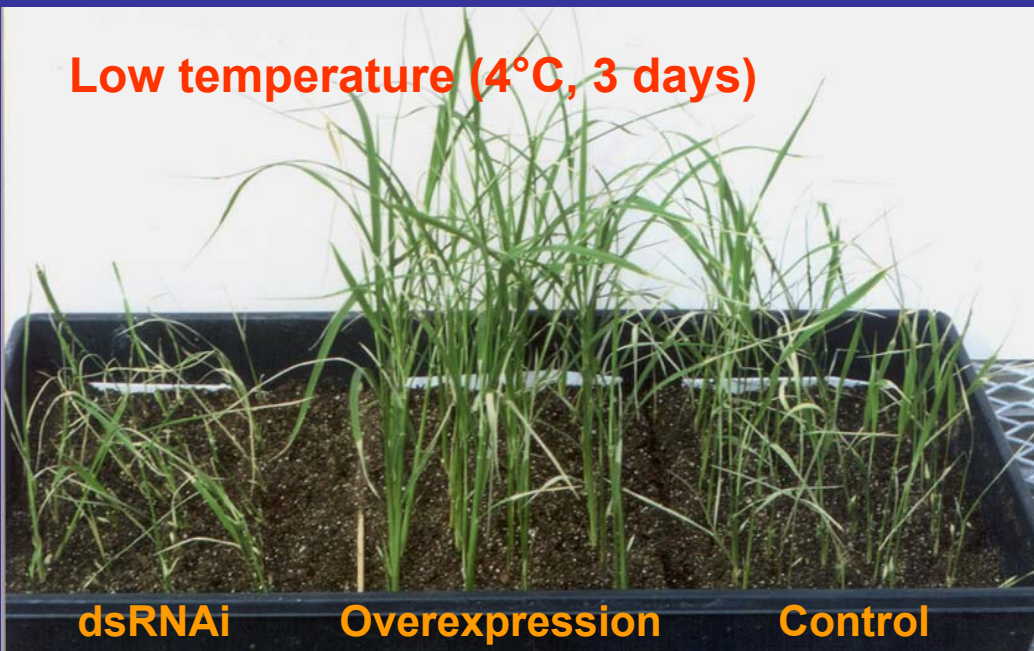

**dsRNAi      Overexpression      Control**

**Drought (water deficit, 3 days)**

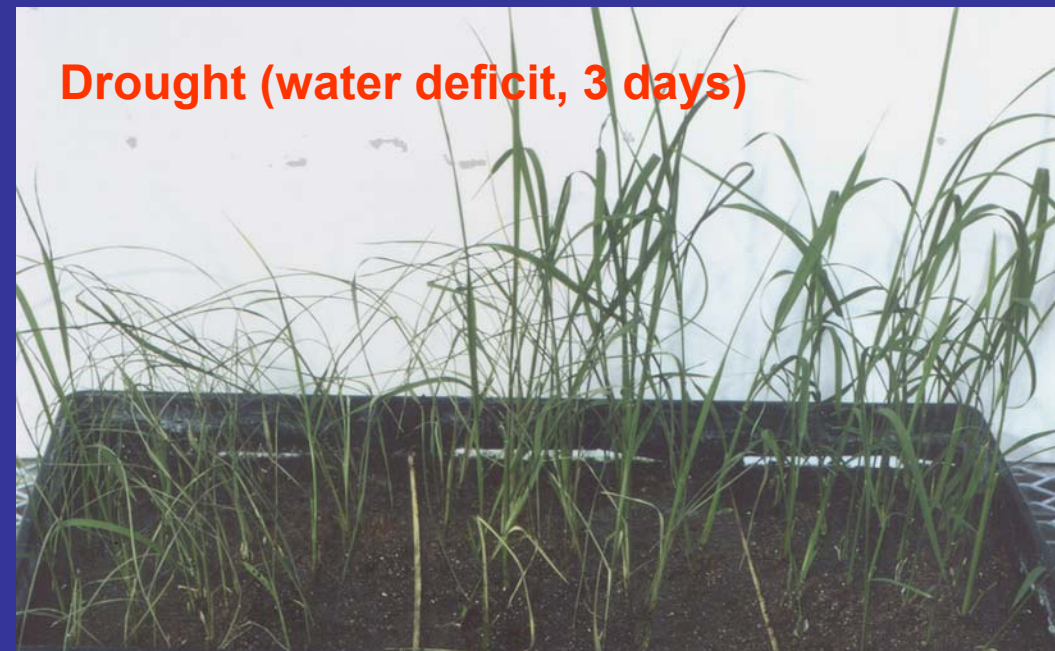

**dsRNAi      Control      Overexpression**

**Salinity (200 mM NaCl, 3 days)**

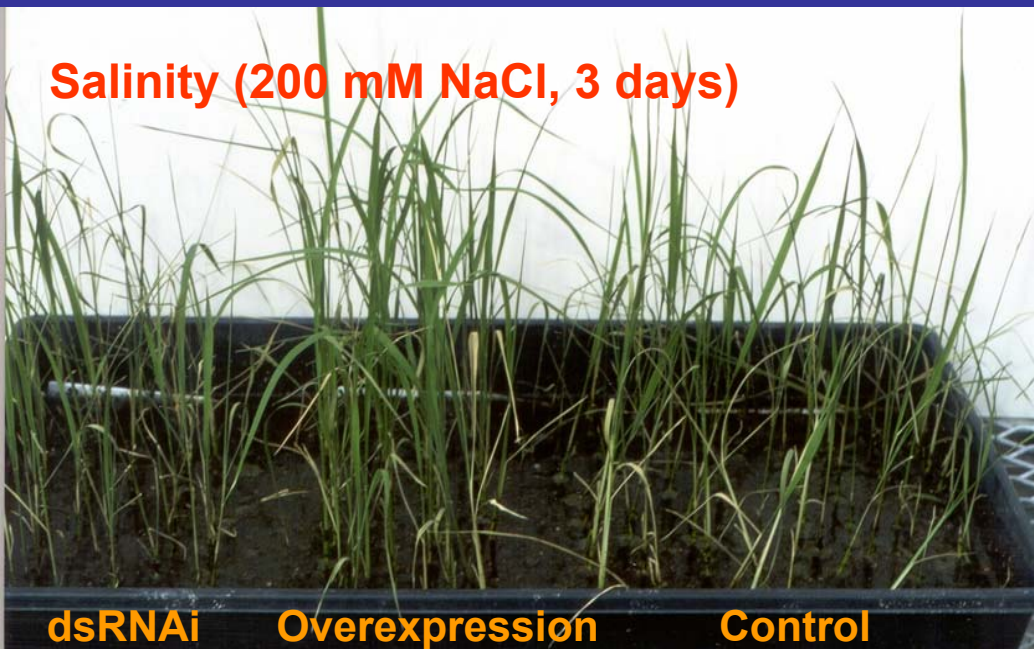

**dsRNAi      Overexpression      Control**

**Supplemental Figure: The ABA-inducible *OsMAPK5* gene is a positive regulator of abiotic stress tolerance in rice plant.**

**Control: control lines;  
dsRNAi: dsRNAi suppression lines;  
Overexpression: overexpression lines.**
